# Supplementary material for: SARS-CoV-2 S Mutations: A Lesson from the Viral World to Understand How Human Furin Works
Source: Int J Mol Sci. 2023 Mar 1;24(5):4791. doi: 10.3390/ijms24054791 (PMC10003014; doi:10.3390/ijms24054791)
Supplement: Supplementary file 1 [file ijms-24-04791-s001.zip › Table S1.xlsx]

## Sheet: Amino acid occurrence_S_656_716
		Sequences deposited in GISAID on 30/08/2022
		12335229															no amino acid replacement
		656	657	658	659	660	661	662	663	664	665	666	667	668	669	670	671	672	673	674	675	676	677	678	679	680	681	682	683	684	685	686	687	688	689	690	691	692	693	694	695	696	697	698	699	700	701	702	703
		P30	P29	P28	P27	P26	P25	P24	P23	P22	P21	P20	P19	P18	P17	P16	P15	P14	P13	P12	P11	P10	P9	P8	P7	P6	P5	P4	P3	P2	P1	P1'	P2'	P3'	P4'	P5'	P6'	P7'	P8'	P9'	P10'	P11'	P12'	P13'	p14'	P15'	P16'	P17'	P18'
		V	N	N	S	Y	E	C	D	I	P	I	G	A	G	I	C	A	S	Y	Q	T	Q	T	N	S	P	R	R	A	R	S	V	A	S	Q	S	I	I	A	Y	T	M	S	L	G	A	E	N
	R	0	1	0	0	2	0	3	0	5	1	3	0	3	2	3	2	0	126	0	3795	0	1155	0	111	826	4407836			0		28	0	0	960	439	0	1	0	0	0	0	2	0	39	10	0	0	0
	K	0	235	1574	1	0	29	0	1	53	0	1	0	0	0	4	0	0	13	0	2056	0	230	2	5217144	0	0	0	1	0	0	3	0	0	22	71	0	0	0	0	0	5	8	0	0	0	1	1165	89
	H	0	17	101	0	440	1	0	4	1	6	0	0	0	0	0	0	0	0	95	44137	0	83139	0	52	0	6454096	2	1	0	53	1	0	0	1	380	0	0	2	0	15	0	0	0	2	1	1	1	180
	D	10	207	546	0	1	8131	1		0	0	0	6	1	5	0	0	4	0	1	0	1	2	0	98	1685	2	0	0	2	0	0	1	96	1	2	0	0	0	5	7	0	0	0	0	6	0	252	173
	E	0	5	0	0	0		0	6	0	1	0	1	3	0	0	0	0	0	0	31	0	11500	0	6	0	0	0	0	29	0	0	4	0	1	51	0	0	0	0	0	0	0	0	0	1	64		0
	Q	0	1	0	0	0	37	0	0	0	0	0	0	0	0	0	0	0	0	0		0		0	11	4	8	111	1282	1	1	0	0	0	0		0	0	0	0	0	0	0	0	0	0	1	694	0
	N	0			0	21	2	0	1	0	2	219	2	0	0	9	0	0	5	2	1	187	0	164		2	36	0	0	0	0	53	0	1	474	1	0	10	1	0	3	22	0	0	0	1	0	0
	T	1	16	143	137	0	1	1	2	9	3	12	1	11	0	43	0	117	2599	0	0		0		991	1883	7	0	2	1026	0	5	1	1173	112	0	41	38	29	96	0		79	3	0	2	400	1	112
	S	0	252	36896		16	0	16	0	0	48	844	136	324	49	0	0	612		3	2	205	1	84	721		129	0	0	1750	8		0	1827		0		14	86	125	4	17	0		0	14	4446	0	593
	F	18	0	1	0	852	0	12	0	0	1	6	0	0	0	2	4	0	0	633	0	1	0	0	0	7043	4	0	0	0	0	1	0	10	0	1	2180	492	66	15	5	0	0	0	59	1	0	0	35
	Y	0	161	260	0		8	3	5	0	1	0	0	1	5	0	2	0	0		5	1	24	0	362	312	826	0	0	0	0	0	0	0	0	0	111	0	0	0		0	0	2	0	0	0	0	205
	W	0	0	1	0	0	0	2	0	0	0	0	0	0	0	0	0	0	0	0	2	0	1	0	0	0	0	228	1653	0	0	0	0	0	0	1	0	0	0	0	1	0	0	0	0	1	0	0	0
	P	0	0	0	42	0	1	1	0	1		0	0	3	1	0	0	1	0	0	35	106	5600	278	0	2172		15	36	88	3	0	1	38	0	25	1054	0	0	9	0	5	0	9	9	1	96	0	1
	I	116	10	45	0	0	0	0	2		0		0	1	1		1	0	112	0	0	5300	0	8407	452	0	0	0	0	0	0	25	1936	2	4094	0	1			0	1	111	354	0	420	0	10	0	79
	L	14	6	0	384	0	3	0	0	21	7	17	0	2	1	60	0	0	1	2	424	2	367	0	1	1	1685	750	2054	0	537	0	1473	0	0	149	1	382	13	1	1	0	401	3820		0	5	3	1
	V		0	0	1	0	65	1	3	21	1	405	13	123	2	3801	0	3494	2	0	0	2	0	0	0	1	0	0	0	6816	1	0		28122	0	0	0	102	198	3474	0	0	14	0	7	15	276199	572	1
	G	3	1	0	0	0	43	0	4	0	1	0		83		0	0	1	355	0	0	0	2	0	5	0	4	2	2	4	6	72	3	118	229	0	3	0	0	16	0	0	0	0	0		39	15	0
	A	27	0	0	24	1	53	2	5	0	8	0	7		8	0	0		1	0	0	439	0	220	0	45	2	0	0		0	0	136		0	0	769	0	2		0	54	2	436	0	11		63	0
	M	0	0	0	0	0	1	0	0	9	0	2	540	0	0	293	0	0	0	0	1	1	1	2	20	0	0	0	0	0	0	0	0	0	0	0	0	90	6	0	0	1		0	0	0	0	0	0
	C	1	0	0	1	12	0		0	0	0	0	11	0	4	0		0	3	15	0	0	0	0	0	7	28	0	0	0	18	5	0	0	6	1	9	0	0	0	7	0	0	0	0	22	0	1	0
		656	657	658	659	660	661	662	663	664	665	666	667	668	669	670	671	672	673	674	675	676	677	678	679	680	681	682	683	684	685	686	687	688	689	690	691	692	693	694	695	696	697	698	699	700	701	702	703
	TOT	190	912	39567	590	1345	8375	42	33	120	80	1509	717	555	78	4215	9	4229	3217	751	50489	6245	102022	9157	5219974	13981	10864663	1108	5031	9716	627	193	3555	31387	5900	1121	4169	1129	403	3741	44	215	860	4270	536	86	281262	2767	1469
[truncated: 22 more columns]
